# Supplementary material for: Pathways Involved in the Synergistic Activation of Macrophages by Lipoteichoic Acid and Hemoglobin
Source: PubMed Central journal article supplement (PMC3468568; doi:10.1371/journal.pone.0047333), 2012-10-10
Supplement: pone.0047333.s001.pdf [file pone.0047333.s001.pdf]

Supplemental Table 1  
 Primers used for qRT-PCR of cytokines and chemokines

| <b>GENE</b>                    | <b>SENSE PRIMER</b>                   | <b>ANTISENSE PRIMER</b>             |
|--------------------------------|---------------------------------------|-------------------------------------|
| <b>IL-1<math>\alpha</math></b> | <b>5'-GAGCGCTCACGAACAGTTG-3'</b>      | <b>5'-TTGGTTAAATGACCTGCAACA-3'</b>  |
| <b>IL-1<math>\beta</math></b>  | <b>5'-TCTTCTTTGGGTATTGCTTGG-3'</b>    | <b>5'-TGTAATGAAAGACGGCACACC-3'</b>  |
| <b>IL-6</b>                    | <b>5'-TTCATGTACTCCAGGTAGCTATGG-3'</b> | <b>5'-TGATGGATGCTACCAAACCTGG-3'</b> |
| <b>IFN-<math>\beta</math></b>  | <b>5'-CATTTCGAATGTTTCGTCCT-3'</b>     | <b>5'-CACAGCCCTCTCCATCAACTA-3'</b>  |
| <b>RANTES</b>                  | <b>5'-GAGTGGTGTCCGAGCCATA-3'</b>      | <b>5'-TGCAGAGGACTCTGAGACAGC-3'</b>  |
| <b>TNF-<math>\alpha</math></b> | <b>5'-GGTCGGGCCATAGAACTGA-3'</b>      | <b>5'-TCTTCTCATTCTGCTTGTGG-3'</b>   |
| <b>HGPRT</b>                   | <b>5'-CCTGGTTCATCATCGCTAATC-3'</b>    | <b>5'-TCCTCCTCAGACCGCTTTT-3'</b>    |
