# Supplementary material for: Pathways Involved in the Synergistic Activation of Macrophages by Lipoteichoic Acid and Hemoglobin
Source: PLoS One. 2012 Oct 10;7(10):e47333. doi: 10.1371/journal.pone.0047333 (PMC3468568; doi:10.1371/journal.pone.0047333)
Supplement: Table S2 — Microarray results of transcripts that showed a greater than 1.5-fold difference in expression between LTA plus Hb and control. (XLSX) [file pone.0047333.s002.xlsx]

## Sheet: Sheet1
Supplemental Table 2
Microarray results of transcripts showing greater than 1.5-fold difference in expression between LTA plus Hb and control
LTA plus Hb - Upregulated				LTA plus Hb - Downregulated
SYMBOL	fold change	p-value		SYMBOL	fold change	p-value
1190003J15Rik	14.1655	3.12655e-07		1110003O08Rik	2.67558	0.000272
1200002N14Rik	1.63972	0.0011933		1110029I05Rik	1.69108	4.8e-05
1200016E24Rik	1.98721	0.000389187		1110032A13Rik	1.73387	0.000664
2210412D01Rik	1.86631	0.00878672		1110068E08Rik	1.85386	9.26e-05
2310001H17Rik	1.70466	0.00117192		1200013B08Rik	2.26702	0.000861
2310004N11Rik	3.40678	5.20335e-06		1500031L02Rik	1.52666	0.0088764
2510010F15Rik	1.71988	7.2818e-06		1700012G19Rik	1.92031	0.000841
2810474O19Rik	1.96867	0.000582914		1700023M03Rik	1.67758	0.0095458
3110043O21Rik	1.81184	0.000156187		1700025G04Rik	1.76052	0.000166
4833444G19Rik	1.73454	0.00816324		1700052O22Rik	1.81411	0.000566
4930431B09Rik	2.38222	0.000348651		1700081H05Rik	1.99907	0.000332
5033414K04Rik	1.5112	0.000377889		1810011H11Rik	1.73288	0.000426
9030625A04Rik	6.0062	2.39713e-05		2010004M13Rik	1.89518	0.000809
9130227N12Rik	2.58784	0.00131734		2010005O13Rik	1.87383	0.00122863
A130019H11Rik	2.39011	0.00210075		2010300C02Rik	1.87103	3.95e-07
A430023D23Rik	1.518	0.0101075		2010317E24Rik	1.89347	0.000577
A430093F15Rik	3.55664	9.6217e-05		2210408F21Rik	1.98315	0.00495245
A530026H04Rik	1.89532	0.000471897		2310007F21Rik	1.66897	0.00340541
A630001G21Rik	1.7314	7.40383e-06		2310035K24Rik	1.63666	0.00102007
AA960436	1.59377	6.81058e-05		2310036D04Rik	1.8044	0.00160779
AB112350	1.6774	0.000371708		2310066E14Rik	1.89394	0.00101016
Abr	1.62087	0.00149616		2410004L22Rik	1.50823	0.005627
Adam17	1.96109	8.72223e-05		2610203C22Rik	1.50226	0.003466
Adar	1.65131	1.2413e-05		2610319H10Rik	1.50263	0.008345
Adora2b	1.59884	0.000824984		2810047L02Rik	2.00881	0.0039858
Aff1	1.51189	0.0158677		2810402K13Rik	1.6677	0.00196645
Aftph	1.80877	0.000302104		2810440J20Rik	1.51576	0.001145
Agpat4	1.58414	0.00246427		2810485I05Rik	1.50886	0.004522
AI607873	5.11246	0.000990747		3010026O09Rik	1.71157	0.00139751
Anxa3	1.63043	0.000657253		3110056O03Rik	1.76895	0.000797
Aoah	2.38127	5.0279e-05		4632428N05Rik	1.55676	0.00261127
Aqp8	2.02914	3.63661e-05		4732460K03Rik	2.16152	2.69e-06
Aqp9	2.2561	0.000245817		4733401I05Rik	2.12987	0.0309539
Arhgef3	2.88838	0.000110883		4831403C07Rik	1.60456	0.00229312
Asb2	1.57355	0.000835286		4922503N01Rik	1.9149	7.38e-05
Atf3	5.40112	7.64785e-05		4930455F23Rik	1.53719	0.006673
Atp13a4	1.88616	0.00143995		4930572J05Rik	1.76861	6.81e-05
Atp2b1	1.79068	0.00149027		4933417E01Rik	2.43586	0.000762
AW061290	1.53483	0.00717626		4933421H10Rik	1.91035	0.00425311
Axud1	1.53375	0.0072212		4933437K13Rik	1.79616	0.000553
B230312A22Rik	1.94362	0.00141665		5330401P04Rik	1.7965	0.001164
Batf	4.81794	3.08472e-07		5730410I19Rik	1.59633	7.81e-05
Batf2	1.73386	5.35674e-05		5830496L11Rik	1.53848	0.004925
BC004012	2.15235	2.69596e-05		6230427J02Rik	1.85241	0.000711
BC006779	4.77542	1.11908e-05		6330403E01Rik	1.76111	0.00229303
BC017612	1.53701	0.00304096		6330416G13Rik	1.69495	0.000315
BC023892	1.59659	0.000296574		6430548M08Rik	1.59628	0.00152498
BC062185	2.10973	0.000926433		9130211I03Rik	1.51337	0.005576
Bcl10	1.54803	0.000791278		9330175B01Rik	1.75832	0.000135
Bcl2a1b	3.49941	0.000274919		9330186A19Rik	2.47809	0.000498
Bcl2a1d	3.46758	0.000112086		9530064J02	1.51463	0.002345
Bcl2l2	1.53876	0.00138289		A130082N24Rik	1.52017	0.00262428
Bik	1.75295	2.41693e-05		A130092J06Rik	3.45716	2.98e-05
Blcap	1.51737	0.000501753		A430106G13Rik	1.53443	0.0100677
Bsdc1	1.64143	0.00175747		A630006E02Rik	1.94454	0.0038284
Bst2	2.09421	0.0199752		A630064P09Rik	1.58283	0.0012205
C030024L24Rik	1.516	0.00540669		A630077B13Rik	1.62232	0.00133574
C130026I21Rik	1.93607	5.18686e-05		A630097D09Rik	1.58935	0.00399851
C130079K02Rik	1.65635	0.0116607		A830007P12Rik	1.83202	0.00265479
C3	4.37671	2.63698e-05		Aatk	1.92002	0.000291
C330006F04Rik	1.52881	0.00113767		Abi3	2.39789	2.07e-05
C430002D13Rik	1.75733	0.000174537		Adcy7	1.60027	0.000758
C630024B01Rik	1.53934	0.0239291		Add3	1.67891	0.000398
Capns2	2.02603	0.00170008		Adrb2	1.5845	0.00126537
Car13	1.92106	0.000176552		AI595366	1.69834	0.000504
Casp4	3.54748	0.000421443		Amica1	1.68866	0.00107816
Cbwd1	1.75424	0.000712438		Ang	1.59386	0.00282732
Ccl2	16.8233	1.18097e-06		Angptl4	3.20247	1.38e-05
Ccl3	6.77477	8.0865e-05		Ank	2.54076	0.00018
Ccl4	5.11335	9.90331e-06		Ankmy2	1.66644	0.000178
Ccl5	18.8466	4.48542e-07		Ankrd10	1.70048	0.010391
Ccl7	9.45982	0.006745		Aplp2	1.55172	0.005633
Ccl9	2.80681	1.46213e-06		Appl2	1.6477	0.00568876
Ccr5	1.71987	0.00145131		Arhgap4	1.52478	0.009567
Ccrl2	4.53231	2.93369e-05		Arl11	2.95089	1.07e-05
Cd14	2.35868	3.16012e-06		Atg9b	2.33442	0.000297
Cd274	2.1399	0.000462103		Atm	1.5697	3.29e-05
Cd40	11.0109	5.9962e-07		B3gnt1	1.5945	0.000333
Cd44	1.91684	0.000372673		B430201A12Rik	1.5325	0.00173066
Cd69	6.46393	1.2833e-05		B930041F14Rik	2.02076	0.00156875
Cd82	1.67801	0.000415007		BC030183	1.54002	0.002376
Cdc42ep2	5.18791	5.06166e-06		BC034090	1.55808	0.00676378
Cdc42ep4	1.52964	0.000284139		BC039093	2.5108	5.53e-05
Cdk2ap2	1.63626	0.00243007		Bcl7a	2.05413	0.00102678
Ceacam2	1.56305	0.00144386		Bcl9l	1.55863	0.003197
Cebpb	1.96084	6.80041e-05		Bhlhb2	2.7564	0.000722
Cias1	1.54721	0.00210735		C030026E19Rik	2.06093	0.000331
Cish	5.39919	1.1748e-05		C230078M08Rik	1.77191	0.000826
Cited2	1.86813	0.00139652		C430004E15Rik	1.65637	0.000215
Cldnd1	1.5822	0.00107897		Capn5	1.7062	0.00088
Clec2d	3.218	1.55081e-05		Cars2	1.52139	0.002287
Clec4e	5.86349	3.02081e-07		Casp2	1.6175	0.00437108
Clecsf9	6.77574	7.80016e-05		Cbx2	1.74592	0.00757271
Clic4	1.64987	7.80016e-05		Cbx8	1.93578	0.00104727
Coq10b	1.50083	0.000853557		Ccdc85b	1.73663	0.00224074
Creb5	2.49452	5.74832e-05		Ccnd1	4.08516	5.92e-05
Csf1	2.00122	4.82093e-06		Ccnd2	1.55423	0.00237845
Csprs	2.99518	5.73403e-05		Ccnd3	1.64093	0.000285
Ctsz	1.74019	0.000235805		Ccne1	1.81778	0.00522492
Cxcl10	8.59625	0.000564		Ccne2	1.726	0.0044626
Cxcl16	3.5107	2.14291e-06		Cd28	1.89823	0.000131
Cxcl2	88.7076	0.000234		Cdan1	1.65545	0.00116302
Cybb	1.89086	0.000212052		Cdca7	1.72208	0.000592
D11Lgp2e	1.85494	0.000145063		Cdk2	1.54244	0.000567
D12Ertd553e	2.38235	0.000106694		Cdt1	3.02015	2.24e-05
D130077B20Rik	2.54084	7.42532e-05		Chaf1a	1.924	0.00362174
D14Ertd668e	1.94453	1.82676e-05		Chaf1b	2.03421	8.93e-06
D230021E06Rik	1.57013	0.00959723		Chn2	1.56125	0.000945
D230048P18Rik	1.62403	0.00695572		Chst3	1.50765	0.000614
Daxx	2.04603	0.00105678		Clspn	2.03333	0.000864
Dcbld2	1.52862	0.00118562		Cnr2	2.0258	3.12e-05
Ddx28	1.71303	0.00028153		Csk	1.61527	0.005893
Ddx58	2.93651	7.2041e-05		Ctnnbip1	1.52396	0.002789
Degs1	1.61235	0.000244853		Cx3cr1	1.59755	0.00214822
Denr	1.93018	0.00248001		Cxcr3	1.66929	0.000256
Dhx58	3.25736	0.000529518		Cyp27a1	1.69156	0.0058475
Dnmt3l	4.17745	4.80961e-06		Cysltr1	1.687	0.00644604
Dock4	1.52332	0.000979124		D130078K04Rik	1.55709	4.97e-05
Dpep2	2.26469	0.000438528		D15Wsu169e	1.52098	0.009456
Dtx3l	1.70673	0.000800491		D16H22S680E	1.67809	0.00362971
Dus2l	1.71227	0.0042997		D430004H20Rik	1.61228	0.0082344
Dusp1	1.71667	0.000499732		D4Ertd681e	1.56902	0.000865
Dusp16	2.883	4.42154e-07		D930048N14Rik	1.51891	0.0010862
E030018N11Rik	2.1142	3.90653e-05		Dennd3	1.63631	0.000262
E030040G24Rik	1.51739	0.000993491		Dgkg	2.60206	0.000328
E130014J05Rik	2.60462	0.00255359		Dhcr24	1.53367	0.00425429
E130207H16Rik	4.91342	1.64803e-05		Dnmt1	1.86759	0.00480667
E430021P16Rik	1.59323	0.000271206		Dtymk	1.50826	0.00231483
Ebi3	3.87183	1.20956e-05		Dusp6	1.81902	0.000158
EG627624	1.71414	0.0018348		Dusp7	2.31348	0.000113
Ehd1	4.27813	0.000167715		Dyrk3	2.33679	0.000106
Eif2ak2	2.12831	4.70467e-05		E2f1	1.80935	0.000223
Emr1	2.97574	0.000355153		E2f2	1.92709	6.98e-05
Eno2	1.87563	0.000195003		E330036I19Rik	2.12473	0.00014
Enpp4	1.84849	0.00227289		Ebi2	3.49203	5.48e-05
Erich1	2.14154	0.000719494		EG328314	2.24174	3.56e-05
Ets2	2.25836	3.01099e-06		Egr1	2.83236	5.04e-05
F630001K14Rik	3.11837	0.000154083		Eif4ebp2	1.52944	0.002377
Fabp3	1.99036	9.40949e-05		Enc1	2.26499	5.23e-05
Fas	11.5784	1.13718e-06		Endod1	1.89878	0.000227
Fcgr4	1.77892	0.00033935		Ephx1	1.87166	0.000312
Flnb	1.57586	0.0092532		Erp29	1.68584	0.006622
Foxn3	2.28467	0.000123869		Esco2	1.5056	0.004576
Fyb	2.84215	1.30524e-05		Etaa1	1.68438	0.00519894
Gadd45a	5.44512	1.92773e-05		Etv5	1.91926	1.93e-05
Gadd45b	2.88844	4.83989e-06		F2rl3	3.75831	0.000268
Gas7	1.56243	0.000202469		F830002E14Rik	11.0839	0.00309778
Gbp1	14.2745	0.000167		F8a	1.69662	0.0013894
Gbp2	4.03873	0.005783		Fblim1	1.66493	0.000484
Gbp3	6.59309	8.58911e-07		Fbxo10	1.73753	0.000966
Gch1	2.11543	5.84525e-05		Fbxo21	2.46925	0.000179
Gdf15	2.58439	0.00128627		Fbxo31	1.91808	0.000194
Gdpd1	2.21363	4.97758e-05		Fbxw4	1.539	0.000157
Gdpd5	1.79014	0.000268898		Fcgr1	1.77743	0.000339
Glipr1	1.96335	0.00629445		Fcgr3	1.71565	0.00377041
Gm885	2.05675	4.92816e-05		Fen1	1.57593	0.004982
Gng2	1.50231	0.00327799		Fgd2	2.07263	0.00024
Gp49a	3.14612	4.21486e-05		Fhod1	3.51739	6.75
Gpr109a	8.1007	8.66531e-05		Fignl1	1.5894	0.0186297
Gpr137b-ps	1.62269	0.000839549		Fmnl3	1.50608	0.009884
Gpr18	2.38622	0.000729252		Fvt1	1.62499	0.000407
Gpr84	7.20865	5.86479e-06		Gcnt1	1.70333	0.000221
Gramd1b	1.76241	0.000216756		Gga2	1.80933	0.000119
Grap	1.92974	0.000837506		Gins1	1.56855	0.000849
Gripap1	1.66524	0.00109575		Gins3	1.92497	0.006119
Gstt4	5.79834	0.007438		Gm347	2.04646	0.000752
Gtpbp2	1.71894	0.000956155		Gmpr	1.56446	0.00366618
H2-M2	6.6335	7.49106e-06		Gnptab	1.58041	0.000321
H60a	1.54284	0.00340147		Gpr114	2.18883	7.52e-05
Harbi1	2.3304	0.000703715		Gpr176	1.72207	0.000329
Hp	1.54199	0.000576392		Gpx1	1.51168	0.005572
Icam1	5.10705	6.17335e-07		H6pd	1.55143	0.009459
Id1	1.5592	0.000227238		Hdac5	1.72884	0.000394
Ier3	8.27724	1.46329e-06		Helb	1.61109	0.00106601
Ifi202b	3.3442	0.000261373		Hhex	2.07218	0.00110257
Ifi35	1.62417	0.00777795		Hist1h2ag	1.73366	0.00121027
Ifi47	1.53043	0.00265209		Hist1h2ah	1.67072	0.001126
Ifit2	5.28856	1.5749e-05		Hist1h2ak	1.72584	0.005623
Ifit3	14.1396	5.53385e-05		Hist2h2ab	1.61227	0.000493
Ifitm3	1.54808	0.0026739		Hmgn3	2.84632	0.000158
Igf2bp2	2.16684	2.34245e-06		Hmha1	2.22139	0.00474069
Igtp	4.3788	5.16649e-05		Hpgd	5.23228	0.000173
Iigp2	5.162	1.74921e-06		Hrbl	1.72916	0.000427
Ikbke	4.67313	5.89082e-05		Hs3st3b1	1.67717	0.000217
Il10ra	3.20814	0.000115138		Hsd17b10	1.66912	0.00169559
Il1a	12.0957	0.005863		Hsd3b7	1.53362	0.00237252
Il1b	28.5762	0.00907		Icos	1.54853	0.0037522
Il27	6.50965	0.0076345		Igfbp4	2.08937	0.000987
Il4i1	1.72204	0.0046744		Impa2	1.90691	0.000143
Il6	15.4187	0.0056428		Inpp5d	1.55917	0.0138578
Ipas	2.05685	0.000103281		Iqce	1.69978	8.16e-05
Irak2	5.07236	6.09633e-05		Irf2bp2	2.0679	4.64e-05
Irak3	5.3633	2.913e-05		Itpk1	1.84773	0.00012
Irf5	1.59476	2.913e-05		Kcnk13	2.1742	9.34e-05
Irf7	2.77288	8.55819e-05		Kcnn4	1.68031	0.00158137
Irf9	3.03885	7.15736e-06		Klc4	1.82957	8.67e-05
Irg1	63.9762	3.15008e-07		Klf2	1.70194	0.0004
Itga5	3.38506	1.69246e-05		Klhl17	1.96039	4.61e-05
Jmjd2a	2.0557	2.55984e-05		Klhl21	2.09304	0.000345
Jund1	1.67559	0.00464145		Klhl30	3.94341	1.21e-05
Klf6	2.08433	1.40764e-05		Klhl6	2.9757	1.11e-05
Klf7	1.88564	8.04923e-06		Klrg2	1.71844	0.00171582
Kremen	1.51463	0.00430985		Lasp1	1.66452	0.0035739
Lamc1	1.67798	9.28383e-05		Lbh	1.69937	7.36e-05
Lcn2	33.4341	7.96711e-07		Ldb1	1.58748	0.005589
Lcp2	2.02892	0.012348		Lin54	1.50437	0.002256
Leng9	1.56034	0.000402721		LOC100044103	1.51807	0.00135174
Lgals9	1.70387	0.000344033		LOC100045342	1.5172	0.005556
Lix1	2.09212	0.00097011		LOC100045343	2.69684	5.56e-05
LOC100038882	10.4128	2.90016e-06		LOC100046641	1.73276	0.0013339
LOC100039742	1.78742	7.06421e-05		LOC100046741	1.52307	0.004132
LOC100044430	2.30503	6.92135e-05		LOC100047480	1.63204	0.0158068
LOC100044968	2.15157	0.000489023		LOC100047651	4.33335	1.37e-05
LOC100045644	1.8597	0.00225088		LOC100047863	1.54647	0.001156
LOC100045869	2.24566	0.000802969		LOC100047936	1.54356	0.0177164
LOC100046232	2.43093	7.39556e-05		LOC100048845	1.76408	1.17e-05
LOC100046781	2.88921	0.000400728		LOC237877	1.68429	0.000371
LOC100047963	2.4675	0.000257612		LOC270152	1.97191	3.65e-05
LOC100048346	5.94933	1.91692e-06		LOC380927	1.59671	0.009934
LOC100048556	2.02925	0.00292301		LOC381140	2.54119	0.00178367
LOC212399	2.02516	0.00520323		LOC386169	2.01772	0.0280195
LOC278105	1.68192	0.00127274		LOC545238	1.64176	0.00156219
LOC380706	6.08355	5.3945e-08		LOC630146	2.28791	0.000145
LOC382972	1.53734	0.00747346		LOC637785	1.6486	0.000401
LOC383942	2.03725	3.57487e-05		LOC676420	2.19129	0.00118447
LOC624083	1.53135	0.00362008		Lrmp	2.03061	4.73e-05
LOC638301	2.19729	0.000125103		Lrrc33	1.69834	0.00359787
LOC677448	1.73998	0.00388735		Lrrk1	1.56479	0.00023
Lpcat2	1.83621	8.73862e-05		Ltc4s	1.70847	0.00598474
Lpxn	1.50667	0.0014039		Lyl1	4.41574	2.34e-05
Ltb	2.83485	5.8399e-05		Lypla3	1.59028	0.005535
MALT-1	1.86726	0.000411194		Lyzl4	1.78292	0.000553
Map3k8	1.69994	0.000909898		Lzts2	2.48469	0.00105975
Mapkapk2	2.38358	3.96623e-05		Map3k1	1.6484	0.000297
Marcks	8.19066	7.99363e-07		Mapk14	2.10753	0.00142143
Marcksl1	8.75031	3.60814e-05		Marveld1	2.06688	0.000276
Mcoln2	2.88813	0.000168763		Mast3	2.22763	0.00011
Mdm2	1.81394	0.00067223		Mbp	1.59912	0.000102
Micall2	1.85761	0.000560632		Mcm10	1.51787	0.006782
Mina	1.63867	0.00994283		Mcm2	1.68762	0.00535505
Mmp12	1.81404	0.0344772		Mcm4	1.72419	0.000454
Mmp13	3.60985	0.007634		Mcm5	1.77928	0.00061
Mmp9	1.72723	0.00968325		Mcm6	1.50106	0.009238
Mocs1	2.17776	0.000383455		Mcm7	1.60221	0.00289313
Mrpl52	1.8633	0.00653084		Meis1	1.52106	0.000853
Mtmr14	2.3288	8.48574e-05		Mfng	1.63674	0.0120834
Mvp	1.71197	0.00334874		Mgst2	1.59605	0.007623
Mx2	7.02118	1.44569e-05		Mical1	1.72661	0.00212829
Myadm	2.04507	0.00034794		Mknk2	1.57127	0.008772
Myd116	6.8139	2.62994e-05		Mrps6	1.57199	0.009345
Nadk	2.34631	1.98e-05		Msh6	2.3303	8.52e-05
Napepld	1.5831	0.00153161		Msrb2	1.6348	0.000441
Ndel1	1.68223	0.0017413		Mum1	2.25555	1.74e-05
Nfkb1	2.81318	1.71868e-05		Mybl2	1.76529	0.000131
Nfkb2	1.62935	0.00455526		Myo1f	1.85644	0.00240791
Nfkbia	5.30294	2.48344e-07		Nanos1	1.92861	0.000363
Nfkbid	1.52208	0.00163134		Nav1	1.62764	8.86e-05
Nfkbiz	14.4238	3.79649e-07		Nfatc1	1.94961	3.91e-05
Notch1	1.64973	0.000993833		Nfic	1.58732	0.000193
Nupr1	2.68027	0.000233885		Nfix	1.60356	0.00101189
Oas1a	1.976	0.00159258		Nfkbil2	1.58667	0.00205194
Oas2	4.09787	2.20262e-05		Nrcam	1.61671	0.00118991
Oasl1	4.10076	4.66091e-05		Nrm	1.70906	0.00141135
Oasl2	4.91821	4.4915e-05		Nrp1	2.2251	1.89e-05
Obfc2a	1.81548	0.00073964		Nuak2	1.52282	0.004856
Odc1	1.62211	3.46525e-05		Osgin1	1.73385	0.000509
OTTMUSG00000000971	2.60376	5.28406e-06		P2ry1	2.88528	2.7e-07
P2rx4	1.68667	0.00527916		P2ry13	2.93727	0.000118
Palld	2.52351	7.07652e-05		P2ry14	2.09121	0.00023
Pde1b	1.55411	0.0013054		P2ry6	1.54913	0.001176
Pdgfb	1.96153	0.00139657		Pacs2	1.70003	0.00160114
Pea15	1.92783	9.61265e-05		Pank1	1.62932	0.00304582
Pea15a	1.6172	0.00382554		Paqr7	2.17899	0.000127
Phlda1	9.14826	1.06914e-06		Pcyox1	1.83424	0.00144044
Pik3ap1	1.53894	0.00116339		Pdlim2	1.63036	0.0153196
Pik3cb	1.59813	0.00316427		Pdxp	2.05399	0.000194
Pilra	3.9822	1.98411e-05		Pex11b	1.59445	0.00584826
Pilrb1	2.649	4.69593e-06		Pip4k2a	1.7502	0.000149
Pip5k1a	1.72893	0.00259126		Pip4k2b	1.63959	0.00159967
Plagl2	2.82619	6.00285e-05		Plau	3.41096	0.000433
Plaur	3.46284	3.7042e-05		Plcl2	1.52315	0.008344
Plek	2.2664	0.0184735		Plekha2	1.5089	0.003781
Plekho2	1.64299	0.000206087		Plekhg3	2.15643	0.00178541
Plk2	3.05966	0.000198822		Plxdc1	1.72721	0.00197576
Plk3	2.33897	5.62151e-05		Pold1	1.98296	0.00105528
Pou2f2	3.7849	5.36668e-05		Pold3	1.73665	7.49e-05
Ppap2b	1.85178	0.000408903		Ppargc1b	2.67316	0.000355
Ppard	1.77848	4.27207e-05		Ppcs	1.65929	0.00701902
Prdx5	1.74282	0.00140533		Prkar2b	1.85198	5.17e-05
Prkcd	1.52605	5.43917e-05		Prr12	1.6017	0.0113201
Prkx	1.61294	0.00097812		Ptpn18	1.55024	0.008723
Prmt2	1.5677	0.00131886		Pwwp2b	1.78164	0.0120039
Psmd10	1.82201	0.0247197		Rab19	1.82633	0.00069
Ptgir	1.79505	0.000538066		Rab27a	2.02998	5.52e-05
Qsox1	1.52924	0.00784581		Rab3a	1.65666	0.00123419
Rab3d	3.10226	0.000675409		Rab3il1	1.83094	0.000747
Ranbp10	1.60715	0.000262793		Rab40c	1.72535	0.000572
Rap1b	1.55656	2.02963e-05		Ranbp3l	1.83935	5.02e-05
Rapgef2	2.68236	0.000429254		Rap2a	1.82226	0.000495
Rapgef5	1.50224	0.00046028		Rapsn	1.54235	0.000395
Rassf4	5.98781	4.94377e-07		Rarb	2.62459	2.29e-05
Rel	1.59675	0.00468734		Rasa3	3.06251	0.000138
Relb	2.46706	0.000187034		Rasgrp3	1.76368	0.00699598
Rffl	1.66801	8.75718e-05		Rassf5	1.82458	7.58e-05
Rgl1	1.57895	0.000294986		Rbm38	1.99009	0.00110356
Rgs1	1.57241	0.000942764		Retsat	1.6611	0.00112249
Rhob	2.21502	0.00293932		Rfc1	1.55851	0.005692
Rhoc	3.42237	4.21069e-06		Rfc2	1.51308	0.007834
Riok3	1.92419	2.85557e-05		Rhebl1	1.58966	0.000443
Rnf213	2.93759	7.08246e-05		Rhoj	1.58535	0.005578
Rrad	1.76929	1.11288e-05		Rin2	2.19619	0.000109
Rras	1.90567	3.27546e-06		Rnase4	2.03945	0.000553
Rsad2	41.8302	2.65605e-07		Rpa1	1.61597	0.003224
Rusc2	1.74989	0.000243567		Rpa2	1.50871	0.00237702
Saa3	46.4213	5.83945e-06		Samd1	1.70497	0.00545063
Samd9l	2.7759	0.000154018		Sap30l	1.63237	0.00254894
Sav1	1.53538	0.000829307		Sbk	1.81231	0.00652064
scavenger receptor	2.06515	0.000286544		Scamp5	1.55039	0.000238
Sdc4	3.17891	7.37218e-05		scl0015365.1_6	1.95778	0.00248514
Sestd1	1.58948	2.65771e-06		Scn11a	1.73894	0.00317751
Sfpi1	1.81571	0.00272183		Serpinb12	1.66549	0.00261987
Slc11a1	1.92921	4.26212e-05		Serpinf1	1.58757	0.0014689
Slc11a2	3.2468	9.00121e-05		Sesn1	2.35646	0.000444
Slc15a3	6.96866	2.07948e-07		Sfrs7	1.52811	0.007628
Slc25a25	1.91786	8.58971e-05		Sft2d2	1.97955	0.000135
Slc2a1	1.70076	0.000205069		Sgk1	1.99514	0.00073
Slc2a6	2.19252	0.000257928		Sh3glb2	1.5781	0.000282
Slc4a7	2.18867	0.000956692		Sigirr	1.52985	0.00997087
Slc7a11	3.20729	7.65192e-05		Sla	2.34475	8.18e-05
Slco3a1	1.90941	1.86928e-05		Slamf9	1.67252	0.00126674
Slfn2	5.55106	0.000486419		Slc13a2	1.59683	0.0190153
Slpi	1.69329	0.00262336		Slc24a3	1.60426	0.00709113
Sntb2	2.18496	0.00084145		Slc25a10	1.55818	0.00304293
Snx20	2.18381	7.16085e-06		Slc37a1	1.76515	8.75e-05
Socs3	17.6272	3.239e-07		Slc40a1	1.6292	0.006793
Sod2	2.6525	0.000483986		Slc45a3	1.98418	7.28e-05
Sp140	1.55043	0.00802218		Slc5a6	1.73323	0.00127286
Sqstm1	2.13006	0.000847072		Slc9a3r2	1.53497	0.00105175
St3gal3	2.20534	0.000113236		Slco2b1	2.04877	0.000296
Stap1	3.79368	2.63271e-05		Smad3	2.28459	0.000185
Stard5	2.08462	0.000125573		Smyd4	1.60531	0.0067613
Stat2	1.5939	0.000617901		Snai2	1.68239	0.00378866
Stim2	1.61876	0.000917583		Snx30	1.62442	0.00111454
Stk40	3.03465	6.12778e-05		Sorl1	1.79463	0.0041054
Swap70	2.74708	1.74651e-06		Spred1	1.65986	0.00170931
Tank	2.02936	0.00294563		Srgap3	1.51891	0.000693
Tdrd7	1.82284	0.0018492		Srpk3	2.68076	5.95e-05
Tlk2	1.51019	0.00450814		St3gal5	1.5181	0.002678
Tlr2	4.38121	3.02948e-06		St5	1.95614	3.9e-05
Tm9sf4	1.79623	0.00448069		Stard8	1.65434	0.0011586
Tmem176b	2.91781	5.44308e-05		Susd3	1.93052	0.00868706
Tmem2	1.53223	0.00334389		Suv420h2	1.94397	0.00140997
Tmem23	1.71817	0.00280805		Tal1	1.66085	0.00223162
Tmem39a	1.51136	0.00206097		Tal2	2.11499	0.00100592
Tmem49	1.60621	1.57228e-05		Tbc1d2	1.52196	4.09e-05
Tmem68	1.87837	0.00590093		Tcf19	1.92554	0.000218
Tnf	21.7963	5.02988e-08		Tctn3	1.50732	0.00108678
Tnfaip2	2.92205	2.57004e-05		Tfdp2	1.5529	0.000679
Tnfaip3	7.33203	6.70304e-05		Thap11	1.7066	1.29e-05
Tnip1	3.9246	4.96522e-06		Tiam1	1.51609	0.00423
Tor3a	2.1068	0.002525		Tk1	2.85168	1.67e-05
Tpm4	1.55543	0.00440046		Tlcd1	1.67774	0.000287
Traf1	10.0572	7.55121e-06		Tlr13	1.82864	0.00016
Trafd1	1.81418	5.33677e-05		Tm6sf1	1.74355	8.08e-05
Trem3	1.85826	0.000529709		Tm7sf3	1.51329	0.0118578
Trex1	3.55953	4.34944e-05		Tm7sf4	1.65498	0.00448069
Trim25	1.58543	0.0139159		Tmem154	2.21333	0.000777
Trim34	1.95694	2.67313e-05		Tmem158	2.02033	0.000339
Trps1	1.53997	0.00989816		Tmem204	2.61191	0.000658
Tsp50	1.68184	8.21635e-05		Tmem41a	1.9781	0.000368
Tyk2	2.30503	0.000743736		Tmem51	2.15368	5.33e-05
Tyki	13.6231	1.99036e-06		Tmem86a	1.9603	3.27e-05
Ube1l	1.77323	0.000230895		Tnfaip8l2	1.56706	0.00494666
Ube2f	1.92362	0.000259979		Tnfrsf11a	1.83313	0.000473
Ugcg	1.62712	0.00304388		Tnfsf13b	2.17331	4.07e-05
Upp1	2.17429	0.00287384		Tns3	1.57895	0.0056903
Usp16	2.19809	0.000233323		Trem2	1.68961	0.00721348
Usp18	5.86491	3.65289e-06		Trerf1	1.63246	0.00109216
Wnt10a	1.67008	0.00142736		Trim8	1.93746	0.000569
Ybx3	6.80042	9.10029e-06		Tsc22d3	2.72452	0.000716
Zc3h12a	5.13639	0.00210394		Tspan14	1.95411	0.00117561
Zfp36	5.50005	1.80493e-05		Tspan32	1.80826	0.00234658
Zfpn1a1	1.64425	0.00103685		Ttyh3	1.50189	0.005023
Znfx1	1.87065	0.000551081		Ubac2	1.54121	0.009238
Znrf1	2.31859	0.00155367		Unc119	1.59282	0.00272479
Zswim4	2.05113	0.000630875		Uvrag	1.71911	0.000572
				Vav3	1.51545	0.003016
				Vgll4	1.52622	0.005829
				Vps37b	1.51079	0.009823
				Wdhd1	2.04118	6.41e-06
				Wipf1	1.58337	0.00632575
				X99384	2.84104	1.91e-06
				Zfp296	1.55751	0.00228677
				Zfp36l1	1.5479	0.009923
				Zfp41	1.67164	3.46e-05
				Zfp710	2.67588	2.62e-05
				Zfyve21	1.67476	2.74e-05
				Zranb3	1.66862	0.00409209
