# Supplementary material for: Pathways Involved in the Synergistic Activation of Macrophages by Lipoteichoic Acid and Hemoglobin
Source: PLoS One. 2012 Oct 10;7(10):e47333. doi: 10.1371/journal.pone.0047333 (PMC3468568; doi:10.1371/journal.pone.0047333)
Supplement: Table S3 — Microarray results of transcripts that showed a greater than 1.5-fold difference in expression between LTA and control. (XLSX) [file pone.0047333.s003.xlsx]

## Sheet: Sheet1
Supplemental Table 3
Microarray results of transcripts showing greater than 1.5-fold difference in expression between LTA and control
LTA - Upregulated				LTA - Downregulated
SYMBOL	fold change	p value		SYMBOL	fold change	p value
1190003J15Rik	6.05675	7.86305e-07		1110003O08Rik	1.80775	0.00722461
2210412D01Rik	1.60773	0.0274749		1200013B08Rik	1.62249	0.00846271
2310001H17Rik	1.54422	0.00256932		1700012G19Rik	1.57848	0.0059112
2310004N11Rik	1.97348	0.00184037		1700052O22Rik	1.55522	0.009954
2810474O19Rik	1.8002	0.00379528		1700081H05Rik	1.94526	0.002034
4833444G19Rik	1.7711	0.00878647		2210408F21Rik	1.57958	0.0233216
4930431B09Rik	1.7238	0.00443217		2310066E14Rik	1.54846	0.0183692
6330407A03Rik	1.7186	0.000312089		2810402K13Rik	1.50257	0.005562
9030625A04Rik	2.99728	5.11983e-05		4732460K03Rik	1.70849	7.6183e-06
9130227N12Rik	2.08189	0.000873173		4922503N01Rik	1.59	2.74265e-05
A430093F15Rik	2.59322	0.000292471		4933417E01Rik	2.01104	0.00129651
Adam17	1.68276	0.00531837		4933421H10Rik	1.53292	0.008394
AI607873	2.23144	0.0108172		9330186A19Rik	1.91719	0.000680669
Aoah	2.00729	9.86652e-05		A130092J06Rik	1.74289	0.000773574
Aqp9	2.29706	7.79637e-05		AI595366	1.64038	0.001267
Arhgef3	1.77949	0.00154843		Ank	1.92771	0.000188276
Arntl	1.52174	0.00899456		Arl11	1.94072	8.89591e-05
Asb2	2.63774	7.2589e-05		Asb10	1.69143	0.00388323
Atf3	3.3031	0.000371138		Atg9b	1.72582	0.0025993
B230312A22Rik	1.70451	0.00152638		B930041F14Rik	1.70834	0.00111623
Batf	2.87609	1.23709e-05		BC039093	1.67533	0.0030266
BC004012	1.80565	0.000690079		BC046404	1.75334	0.00120661
BC006779	2.19929	0.000838502		Bcl7a	1.54937	0.005334
BC062185	1.55512	0.00850361		Bhlhb2	2.01772	0.00329867
Bcl2a1b	2.08882	0.00578667		C030026E19Rik	1.69675	0.00138313
Bcl2a1d	1.97313	0.000467474		C130050O18Rik	1.59859	0.000737651
Bik	1.60576	0.000258783		C230078M08Rik	1.52958	0.009231
Bst2	2.19844	0.0272126		Cbx2	1.66826	0.0108765
C030013C21Rik	1.60385	0.00138313		Cbx8	1.72971	0.00112169
C3	3.14408	0.000147767		Ccnd1	1.77052	0.00133597
Capns2	1.83887	0.000850714		Ccne1	1.58505	0.002387
Casp4	2.35088	9.06604e-05		Ccne2	1.53921	0.006823
Ccl2	6.51496	2.20642e-05		Cdt1	1.81172	0.00254405
Ccl3	5.88098	0.000179068		Chaf1a	1.53112	0.007783
Ccl4	4.03433	3.54249e-05		Chaf1b	1.65862	2.75588e-05
Ccl5	1.50646	0.00181038		Chst1	2.88994	3.05993e-05
Ccl7	3.26795	0.0056432		Clspn	1.64077	0.00477374
Ccl9	1.62274	0.00120796		Cnr2	1.51105	0.000548394
Ccrl2	1.54708	0.00189262		Dgkg	1.61766	0.0031052
Cd14	1.87331	0.000248321		Dusp7	1.55668	0.007756
Cd40	4.18021	2.29019e-06		Dyrk3	1.59118	0.000840319
Cd69	4.29884	5.97351e-05		E330036I19Rik	1.65773	0.000150598
Cdc42ep2	3.09056	1.51669e-05		Ebi2	1.88387	0.000862068
Cebpb	1.62668	0.000356194		EG328314	1.90099	0.000262751
Cish	2.89083	1.68684e-05		Egr1	1.56926	0.00327106
Cited2	1.8888	0.000262493		Elk3	1.82066	0.000813058
Clec2d	2.15932	0.000348421		Enc1	1.75954	0.000252713
Clec4e	3.13399	2.26811e-07		Ephx1	1.50087	0.003358
Clecsf9	3.64985	0.000844563		Etv5	1.59661	8.32667e-05
Csprs	2.14364	0.000267807		F2rl3	2.23649	0.0013827
Ctsz	1.75867	0.000896188		Fbxo21	1.66489	0.00206789
Cxcl10	1.7655	0.0065387		Fcgr3	1.54673	0.009237
Cxcl16	2.38339	1.22396e-06		Fgd2	1.58216	0.00127551
Cxcl2	28.6294	0.0045772		Fhod1	2.14575	0.000250772
Cybb	1.53743	0.00340976		Gm347	1.69849	0.00210818
D12Ertd553e	2.12875	0.00115899		Gpr114	1.70521	3.14904e-05
D130077B20Rik	1.69322	8.66829e-05		Hist1h2ak	1.51043	0.001733
D230048P18Rik	1.85572	0.0102727		Hmgn3	2.20951	0.000541934
Ddx58	1.70956	0.00140509		Hmha1	1.66416	0.0373089
Denr	1.6206	0.0109573		Hpgd	2.36938	0.00291569
Dhx58	1.6182	0.000793842		Igfbp4	1.69126	0.00203508
Dnmt3l	2.85895	4.39884e-05		Impa2	1.59951	0.000384749
Dpep2	1.80727	0.00176224		Itpk1	1.60443	0.00358447
Dus2l	1.6334	0.00447475		Klhl21	1.5567	0.0281953
Dusp16	2.13534	1.65666e-05		Klhl30	2.36434	0.000256719
E030018N11Rik	1.68475	0.00296317		Klhl6	1.64674	0.00022411
E130014J05Rik	2.00226	0.00942813		LOC100045342	1.52494	0.004472
E130207H16Rik	2.67561	0.000213728		LOC100045343	2.09017	0.000194791
Ebi3	2.33639	5.63568e-05		LOC100046641	1.50342	0.005692
Ehd1	2.70613	0.000735093		LOC100047651	2.5578	0.000259642
Emr1	2.46585	0.00121627		LOC270152	1.6018	0.000769843
Erich1	1.57673	0.00407523		LOC381140	2.0686	0.0027053
Ets2	2.07283	0.000429976		LOC630146	1.9777	0.00167618
F630001K14Rik	2.71781	0.000267913		LOC676420	1.62041	0.00950418
Fas	7.09661	6.14613e-06		Lrmp	1.53268	0.002873
Foxn3	1.70567	0.0002658		Ltc4s	1.58082	0.00018032
Fyb	2.83637	0.000320164		Lyl1	1.97525	0.00173869
Gadd45a	3.53364	2.85459e-05		Lzts2	2.16396	0.00156647
Gadd45b	1.98021	4.8248e-05		Map2k6	1.50774	0.0047562
Gbp1	3.06644	0.0087334		Mapk14	1.53835	0.001459
Gbp3	1.97274	6.08776e-05		Mast3	1.53986	0.005927
Gch1	1.61493	0.000934486		Mcm5	1.5064	0.005816
Gdf15	1.68014	0.00866186		Msh6	1.60823	0.000426245
Gdpd1	1.82384	0.000189845		Mum1	1.5878	0.009937
Gdpd5	1.6965	0.000775408		Mybl2	1.52893	1.05476e-05
Glipr1	2.03811	0.00435148		Nanos1	1.55501	0.00328605
Gm885	1.55757	0.00168188		Nfatc1	1.58185	0.000123709
Gng2	1.57466	0.002204		P2ry1	1.5823	0.000791551
Gp49a	2.61414	3.63975e-05		P2ry13	2.16651	2.84919e-05
Gpr109a	7.42618	0.000107629		P2ry14	1.76507	0.00137433
Gpr137b-ps	1.73078	0.000767866		Paqr7	1.57509	0.000150519
Gpr18	2.17497	0.000453243		Plau	2.17796	0.00362745
Gpr84	5.80486	7.70182e-05		Pold1	1.50143	0.001782
Gramd1b	1.56174	0.000565904		Ppargc1b	1.54835	0.004482
Gstt4	2.23446	0.0076345		Rab19	1.53036	0.00314325
H2-M2	3.5298	0.000109321		Rab27a	1.67028	0.00928754
Herpud1	1.59397	1.42238e-05		Rab3a	1.50279	0.00468569
Hp	1.65312	0.000492162		Rad54l	1.63632	0.0129408
Icam1	2.80062	5.47067e-06		Ranbp3l	1.7855	0.000124645
Id1	1.78302	5.82417e-06		Rapsn	1.55949	0.000983444
Ier3	6.12475	5.11318e-06		Rarb	1.70765	0.00148536
Ifi202b	1.7877	0.00581198		Rasa3	1.78825	0.0015571
Ifit2	1.82771	0.00949		Rbm38	1.60229	0.00312425
Ifit3	4.88284	0.00348107		Rin2	1.64729	0.00233918
Igf2bp2	1.59667	0.00266984		Rnase4	1.63157	0.00351638
Igtp	1.91265	0.000374805		Sesn1	1.78996	0.00177438
Iigp2	2.20516	7.48696e-05		Sft2d2	1.56302	0.000484023
Ikbke	2.98134	0.000500514		Sla	1.6785	0.00112173
Ikzf1	1.60594	0.000104083		Slc24a3	1.51411	0.002845
Il10ra	2.19161	0.000677636		Slc37a1	1.5156	0.00446198
Il1a	4.02266	0.00233564		Slc45a3	1.7709	0.000132241
Il1b	8.08864	0.00223476		Smad3	1.69194	0.00167242
Il27	1.93767	0.00776345		Srpk3	1.87061	0.000434698
Il6	3.75443	0.0099563		St3gal5	1.58831	0.00104903
Ipas	1.80415	3.07352e-05		Suv420h2	1.51772	0.001846
Irak2	3.41208	8.74823e-05		Tcf19	1.5458	0.00102893
Irak3	3.31679	5.28399e-05		Tk1	1.7851	1.17068e-05
Irf9	1.9487	0.000112105		Tmem154	1.68636	0.0040335
Irg1	31.5032	1.47912e-06		Tmem204	2.20101	0.000732074
Itga5	2.27933	0.000755297		Tmem51	1.72789	0.000320719
Klf6	1.74374	0.00136515		Tmem86a	1.80575	0.000952011
Klf7	1.53213	0.00620467		Tnfsf13b	1.68394	0.0007644
Lamc1	1.5329	0.000821786		Tsc22d3	1.858	0.00867219
Lcn2	13.1333	1.22488e-05		X99384	1.97427	6.28513e-06
Lcp2	1.86003	0.0239994		Zfp710	1.91652	0.000676768
Lix1	1.70763	5.91109e-05
LOC100038882	2.47999	0.000661931
LOC100045869	1.65178	0.00175992
LOC100046232	2.35135	1.01526e-05
LOC100046781	2.62795	0.000916002
LOC100047963	1.9098	0.00688299
LOC100048346	2.50963	2.68803e-05
LOC100048556	1.75108	0.000368297
LOC212399	1.71062	0.019615
LOC278105	1.57457	0.00181666
LOC380706	2.62613	0.00028796
LOC383942	1.91693	0.00107618
Lpcat2	1.50105	0.00682485
Ltb	2.86964	0.000154807
Map3k8	1.61139	0.000168273
Mapkapk2	1.71327	0.000664195
Marcks	2.99423	1.13406e-05
Marcksl1	4.91585	0.00103684
Mcoln2	1.97084	0.00160921
Micall2	1.61722	0.00106915
Mmp12	1.51316	0.0228632
Mmp9	1.7742	0.00984056
Mocs1	1.71112	0.00070931
Mrpl52	1.71346	0.00400365
Mtmr14	1.5292	0.00064987
Mx2	2.09821	0.000159808
Myadm	1.64341	0.00733982
Myd116	3.1482	0.000273423
Nadk	1.99782	0.000106459
Nfkb1	1.8518	0.000121838
Nfkbia	3.95014	3.51641e-05
Nfkbid	2.06089	0.000359084
Nfkbiz	12.1796	7.07843e-06
Notch1	1.75825	0.00351617
Nupr1	1.70699	0.0060839
Oas2	2.25496	3.21206e-06
Oasl1	1.5372	0.000755795
Oasl2	2.54544	0.00158385
Obfc2a	1.5386	0.0239479
Odc1	1.61301	0.000246169
Phlda1	4.3205	1.09666e-05
Pik3cb	1.5446	3.22116e-05
Pilra	3.21001	5.09423e-05
Pilrb1	2.2154	8.71882e-05
Plagl2	2.19136	0.000360521
Plaur	2.26688	1.72314e-05
Plek	2.37337	0.00331707
Plk2	1.90914	0.000693982
Plk3	1.84282	0.000954138
Pou2f2	4.21944	1.1083e-05
Ppard	1.59741	0.000155772
Psmd10	1.58094	0.00176947
Ptpn6	1.67387	0.00554299
Rab3d	1.51433	0.0130482
Rapgef2	2.13775	0.00148206
Rapgef5	1.52609	0.00890666
Rassf4	3.58747	1.02208e-05
Relb	1.63638	0.00358947
Rhob	1.65647	0.0100827
Rhoc	2.36933	0.000252014
Riok3	1.78149	0.000107791
Rnf213	1.72373	0.000114256
Rras	1.50197	2.0619e-05
Rsad2	7.55831	9.59984e-06
Saa3	23.0759	6.36839e-06
Samd9l	1.69165	0.00164646
scavenger receptor	1.67657	0.000148279
Sdc4	2.40528	0.00180906
Slc11a1	2.01284	0.000717828
Slc11a2	2.72806	0.000438107
Slc15a3	4.10258	5.19819e-07
Slc25a25	1.68477	0.000588291
Slc2a1	1.51227	0.00054042
Slc2a6	1.73594	5.61671e-05
Slc4a7	1.81083	0.00215299
Slc7a11	2.54275	2.08117e-05
Slfn2	2.82062	0.000553728
Sntb2	2.1833	0.000452011
Snx20	1.6208	0.00206455
Socs3	11.6599	7.91213e-07
Sod2	1.6977	0.00362128
Sqstm1	1.8851	0.00811631
St3gal6	1.59595	0.00104903
Stap1	3.06692	4.4603e-05
Stard5	1.54566	0.00111835
Stk40	2.18092	0.00114337
Swap70	2.0867	9.43571e-06
Tank	1.51998	0.00011718
Tlr2	3.41222	1.05224e-05
Tm9sf4	1.51874	7.00306e-05
Tmem176b	2.69848	0.000238829
Tmem23	1.5035	0.0178387
Tmem68	1.87366	0.0037319
Tnf	11.2374	1.98345e-07
Tnfaip2	1.64067	0.0128206
Tnfaip3	3.62475	0.000533412
Tnip1	3.35047	2.31593e-05
Traf1	3.98086	0.000212461
Trem3	1.87376	0.000665215
Tyk2	1.78505	0.000209506
Tyki	3.96034	0.000119145
Ube2f	1.59373	0.00295402
Usp16	1.63874	0.000570249
Usp18	2.5245	6.98764e-06
Wnt10a	1.9022	0.000475917
Ybx3	3.50119	6.56887e-06
Zc3h12a	3.83622	1.31732e-05
Zfp263	1.51799	0.00835793
Zfp36	3.93399	5.22054e-05
Zfpn1a1	1.76822	0.000837077
Znrf1	2.00537	0.000658652
