# Supplementary material for: Pathways Involved in the Synergistic Activation of Macrophages by Lipoteichoic Acid and Hemoglobin
Source: PLoS One. 2012 Oct 10;7(10):e47333. doi: 10.1371/journal.pone.0047333 (PMC3468568; doi:10.1371/journal.pone.0047333)
Supplement: Table S5 — Enrichment of Gene Ontology Terms for genes expressed only when macrophages were stimulated by LTA plus Hb. (XLSX) [file pone.0047333.s005.xlsx]

## Sheet: Sheet1
Supplemental Table 5
Enrichment of Gene Ontology Terms for genes expressed only when macrophages were stimulated by LTA plus Hb
	up-regulated genes
Category	Term	Count	%	PValue	Genes	List Total	Pop Hits	Pop Total	Fold Enrichment	Bonferroni	Benjamini	FDR
GOTERM_BP_FAT	GO:0002250~adaptive immune response	4	3.27869	0.011178	BCL10, IRF7, NFKB2, PRKCD	76	84	13588	8.51378	0.999886	0.999886	15.8673
GOTERM_BP_FAT	GO:0007242~intracellular signaling cascade	12	9.83607	0.0113141	BCL10, ABR, DUSP1, ADORA2B, RRAD, RAP1B, TLK2, PEA15A, CDC42EP4, DAXX, PRKCD, RGL1	76	915	13588	2.34478	0.999898	0.989917	16.045
GOTERM_BP_FAT	GO:0006644~phospholipid metabolic process	5	4.09836	0.012545	NAPEPLD, FABP3, PIP5K1A, AGPAT4, PPAP2B	76	163	13588	5.48434	0.999963	0.966632	17.6373
GOTERM_BP_FAT	GO:0001816~cytokine production	3	2.45902	0.0234593	REL, IRF7, PRKCD	76	43	13588	12.4737	1	0.978425	30.5712
GOTERM_MF_FAT	GO:0003700~transcription factor activity	11	9.01639	0.0241147	BATF2, REL, IRF5, ZNFX1, IRF7, TRPS1, CREB5, SFPI1, NFKB2, AFF1, STAT2	85	776	13288	2.21601	0.997593	0.950938	27.1312
GOTERM_BP_FAT	GO:0044093~positive regulation of molecular function	6	4.91803	0.0268943	BCL10, NDEL1, ADORA2B, CSF1, STIM2, CEACAM2	76	306	13588	3.50568	1	0.974558	34.2315
GOTERM_BP_FAT	GO:0001817~regulation of cytokine production	4	3.27869	0.0414936	H60A, BCL10, ADORA2B, REL	76	139	13588	5.14502	1	0.992492	47.8669
GOTERM_BP_FAT	GO:0006915~apoptosis	7	5.7377	0.0431455	BCL10, BCL2L2, RFFL, PEA15A, EIF2AK2, DAXX, BLCAP	76	465	13588	2.69145	1	0.988374	49.2309
GOTERM_BP_FAT	GO:0006955~immune response	7	5.7377	0.0454393	H60A, BCL10, CCR5, IRF7, NFKB2, OAS1A, PRKCD	76	471	13588	2.65717	1	0.984625	51.0697
GOTERM_BP_FAT	GO:0012501~programmed cell death	7	5.7377	0.0462207	BCL10, BCL2L2, RFFL, PEA15A, EIF2AK2, DAXX, BLCAP	76	473	13588	2.64593	1	0.978153	51.6817
GOTERM_BP_FAT	GO:0001775~cell activation	5	4.09836	0.0469875	H60A, BCL10, SFPI1, NFKB2, PRKCD	76	246	13588	3.63393	1	0.970846	52.2753
GOTERM_BP_FAT	GO:0016064~immunoglobulin mediated immune response	3	2.45902	0.0472932	BCL10, IRF7, PRKCD	76	63	13588	8.51378	1	0.961695	52.5101
GOTERM_BP_FAT	GO:0008283~cell proliferation	5	4.09836	0.0475681	NDEL1, PDGFB, BCL2L2, RAP1B, PRKCD	76	247	13588	3.61922	1	0.951644	52.7202
	down-regulated genes
Category	Term	Count	%	PValue	Genes	List Total	Pop Hits	Pop Total	Fold Enrichment	Bonferroni	Benjamini	FDR
GOTERM_BP_FAT	GO:0006260~DNA replication	16	6.75105	2.49782e-10	GINS1, GINS3, NFIX, MCM2, MCM10, MCM4, MCM6, POLD3, RPA1, RPA2, MCM7, RFC1, RFC2, HELB, NFIC, FEN1	159	152	13588	8.9957	3.02236e-07	3.02236e-07	4.04231e-07
GOTERM_BP_FAT	GO:0006259~DNA metabolic process	19	8.01688	1.92852e-06	GINS1, GINS3, NFIX, MCM2, MCM10, MCM4, ESCO2, ATM, MCM6, POLD3, RPA1, RPA2, MCM7, RFC1, RFC2, HELB, DNMT1, NFIC, FEN1	159	421	13588	3.85682	0.00233079	0.00116608	0.00312095
GOTERM_BP_FAT	GO:0006270~DNA replication initiation	4	1.68776	0.000174344	MCM7, MCM2, MCM4, MCM6	159	10	13588	34.1836	0.190205	0.0679089	0.281774
GOTERM_BP_FAT	GO:0006268~DNA unwinding during replication	4	1.68776	0.000237679	MCM7, MCM2, MCM4, MCM6	159	11	13588	31.076	0.249957	0.069382	0.383951
GOTERM_BP_FAT	GO:0032508~DNA duplex unwinding	4	1.68776	0.000314204	MCM7, MCM2, MCM4, MCM6	159	12	13588	28.4864	0.316308	0.0732296	0.507278
GOTERM_BP_FAT	GO:0007242~intracellular signaling cascade	24	10.1266	0.000369926	RHOJ, RAP2A, VAV3, ADCY7, MKNK2, RAB40C, ATM, PLCL2, TNS3, PLEKHG3, ADRB2, RASSF5, EIF4EBP2, RASGRP3, TIAM1, MAP3K1, FBXO31, CHN2, SPRED1, INPP5D, LOC100047863, CSK, LRRK1, RHEBL1	159	915	13588	2.24155	0.360899	0.0718997	0.596987
GOTERM_BP_FAT	GO:0006915~apoptosis	13	5.48523	0.00812521	E2F1, E2F2, PACS2, SGK1, NUAK2, ATM, GPX1, RASSF5, MAP3K1, TCTN3, INPP5D, CASP2, AATK	159	465	13588	2.38918	0.999948	0.666079	12.3686
GOTERM_BP_FAT	GO:0045646~regulation of erythrocyte differentiation	3	1.26582	0.0082146	TAL1, LDB1, INPP5D	159	12	13588	21.3648	0.999954	0.63141	12.4963
GOTERM_BP_FAT	GO:0012501~programmed cell death	13	5.48523	0.00923475	E2F1, E2F2, PACS2, SGK1, NUAK2, ATM, GPX1, RASSF5, MAP3K1, TCTN3, INPP5D, CASP2, AATK	159	473	13588	2.34877	0.999987	0.639601	13.9416
GOTERM_BP_FAT	GO:0050714~positive regulation of protein secretion	3	1.26582	0.0162959	KCNN4, ANG, SCAMP5	159	17	13588	15.081	1	0.783307	23.3481
GOTERM_BP_FAT	GO:0002861~regulation of inflammatory response to antigenic stimulus	3	1.26582	0.0181945	GPX1, LOC100048845, FCGR1, CD28	159	18	13588	14.2432	1	0.772637	25.7075
